# Supplementary material for: Evolution and Functional Analysis of orf1 Within nif Gene Cluster from Paenibacillus graminis RSA19
Source: PubMed Central journal article supplement (PMC6429469; doi:10.3390/ijms20051145), 2019-03-06
Supplement: ijms-20-01145-s001.pdf [file ijms-20-01145-s001.pdf]

**Table S1.** Comparison of the predicted protein encoded by the *orf1* gene from *P. graminis* RSA19 with those from other diazotrophic species at amino acid sequence level.

| Species                            | Amino acid identity (%) |
|------------------------------------|-------------------------|
| <i>Paenibacillus sonchi</i>        | 89.36% (168/188)        |
| <i>Paenibacillus riograndensis</i> | 88.83% (167/188)        |
| <i>Paenibacillus sabine</i>        | 61.83% (115/186)        |
| <i>Paenibacillus durus</i>         | 59.57% (112/188)        |
| <i>Frankia</i> sp. EuIK1           | 26.51% (22/83)          |
| <i>Cyanothece</i> sp. ATCC 51142   | 30% (24/80)             |
| <i>Rhodopseudomonas palustris</i>  | 32.76% (19/58)          |
| <i>Azospirillum brasilense</i>     | 24.06% (32/133)         |
| <i>Herbaspirillum seropedicae</i>  | 20.47% (26/127)         |
| <i>Rhodobacter capsulatus</i>      | 24.22% (31/128)         |
| <i>Azotobacter vinelandii</i>      | 18.75% (24/128)         |
| <i>Clostridium ultunense</i>       | 32.89% (49/149)         |

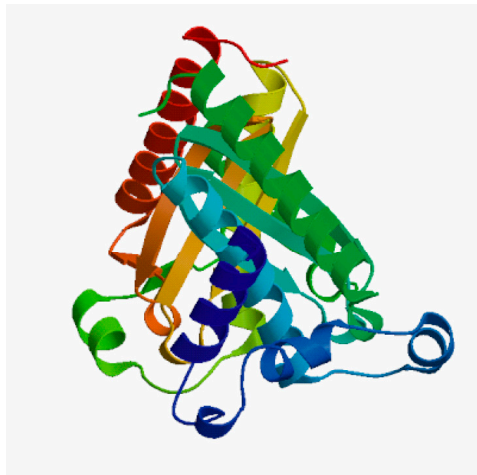

Orf1 (*P. graminis* RSA19)

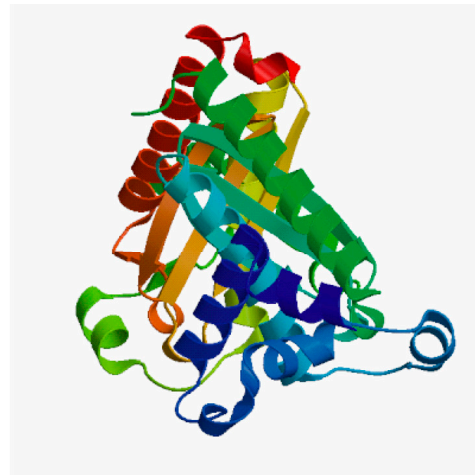

Cce\_0566 (*Cyanothece* 51142)

Figure S1: Comparison of three-dimensional structure of *P. graminis* RSA19 Orf1 with that of Cce\_0566 (DUF269) of *Cyanothece* 51142. The 3-dimensional structure model was predicted by SWISS-MODEL, which is an automated comparative protein modeling server.
